# Neural tracking as an objective measure of auditory perception and speech intelligibility

Jana Van Canneyt, Marlies Gillis\*, Jonas Vanthornhout, Tom Francart

<sup>a</sup>*ExpORL, Dept. of Neurosciences, KU Leuven, Herestraat 49 bus 721, Leuven, 3000, Belgium*

---

## Abstract

The neural tracking framework enables the analysis of neural responses (EEG) to continuous natural speech, e.g., a story or a podcast. This allows for objective investigation of a range of auditory and linguistic processes in the brain during natural speech perception. This approach is more ecologically valid than traditional auditory evoked responses and has great potential for both research and clinical applications. In this article, we review the neural tracking framework and highlight three prominent examples of neural tracking analyses. This includes the neural tracking of the fundamental frequency of the voice ( $f_0$ ), the speech envelope and linguistic features. Each of these analyses provides a unique point of view into the hierarchical stages of speech processing in the human brain.  $f_0$ -tracking assesses the encoding of fine temporal information in the early stages of the auditory pathway, i.e. from the auditory periphery up to early processing in the primary auditory cortex. This fundamental processing in (mostly) subcortical stages forms the foundation of speech perception in the cortex. Envelope tracking reflects bottom-up and top-down speech-related processes in the auditory cortex, and is likely necessary but not sufficient for speech intelligibility. To study neural processes more directly related to speech intelligibility, neural tracking of linguistic features can be used. This analysis focuses on the encoding of linguistic features (e.g. word or phoneme surprisal) in the brain. Together these analyses form a multi-faceted and time-effective objective assessment of the auditory and linguistic processing of an individual.

**Keywords:** Neural tracking, Speech intelligibility, EEG,  $f_0$  tracking, envelope tracking, linguistic features

---

Hearing loss is typically defined as a loss of perception of soft sounds, but hearing-impaired people tend to complain more about struggles to *understand* speech. To provide hearing-impaired people with appropriate rehabilitation, their hearing abilities need to be carefully evaluated in terms of both sound perception and speech intelligibility. The current golden standard methods for hearing evaluation, i.e. tone and speech audiometry, require active feedback from the tested person, which is not always obtainable (e.g. young children) or accurate (e.g. malingering). For this reason researchers are working towards new ‘objective’ methods, which rely on bodily signals, to assess hearing in clinical practice. One particularly promising objective measure is derived using the neural tracking framework, where

---

\*Email address of corresponding author: [marlies.gillis@kuleuven.be](mailto:marlies.gillis@kuleuven.be)

13 electrical activity in the auditory pathway is measured with electroencephalography (EEG) while a participant listens  
14 to continuous speech, e.g. a story or a podcast. The use of continuous speech is a promising innovation as this type of  
15 stimulus is more relevant for communication in daily life than the tones and short speech samples used for behavioural  
16 audiometry. In this article, we discuss the neural tracking framework and its (dis)advantages, and review how it may  
17 be used to objectively assess auditory perception and predict speech intelligibility. We also discuss the opportunities  
18 and challenges for clinical implementation.

## 19 **1. The neural tracking framework**

### 20 *1.1. Introduction*

21 Traditional objective measures, like the auditory brainstem response (ABR), the auditory steady-state response (ASSR)  
22 or the frequency following response (FFR), require EEG measurement while a participant listens to repetitive presen-  
23 tations of a short sound stimulus (for a review, see Picton (2010)). Typical stimuli include clicks, tones, chirps and  
24 vowels. The repetitive stimulation is necessary as response instances need to be averaged to reduce measurement  
25 noise, but it is highly unnatural and demotivating for the listener (Theunissen et al., 2000; Hamilton and Huth, 2018).  
26 In recent years, technical advances have made it possible to analyse neural responses measured while a participant  
27 listens to continuous natural speech, without repetition (for a review, see Brodbeck and Simon, 2020). These neural  
28 responses to continuous speech are called neural tracking responses as they reflect how the auditory system of the  
29 listener ‘tracks’ the presented speech. They were originally proposed by Lalor et al. (Lalor et al., 2009; Lalor and  
30 Foxe, 2010) and the methods were further developed by, amongst others, Ding and Simon (2012a,b), O’Sullivan et al.  
31 (2015) and Crosse et al. (2016).

32 The possibility to investigate continuous speech processing with the neural tracking framework is an important in-  
33 novation. Humans do not communicate with repetitive tones or clicks, as used for traditional objective measures.  
34 Context-rich continuous speech better approximates natural language use and as a result, research findings with these  
35 stimuli are more relevant for auditory processing in day-to-day communication (Kei et al., 1999; Pichora-Fuller et al.,  
36 2016; Hamilton and Huth, 2018; Keidser et al., 2020). Moreover, continuous speech is more comfortable and inter-  
37 esting for the listener. The stimulus can even be targeted towards the population of interest: e.g. a fairy-tale for young  
38 children or a podcast for adults. When a participant is interested in the content of the stimulus, they maintain attention  
39 for longer and as a result, the neural response measurement may be of higher quality. Finally, natural speech stimuli  
40 are better suited for research with hearing aids. Hearing aid signal processing is designed specifically for natural  
41 speech and may behave unpredictably with artificial sounds, corrupting the experiment.

42 In the neural tracking framework, neural responses to continuous speech are analysed without averaging over response  
43 instances. The most common approach to do so is based on linear encoding/decoding models. Other response analysis  
44 methods exist, including inter-trial coherence (ITC) (Zion Golumbic et al., 2013; Bourguignon et al., 2020), cross-  
45 correlation (Kong et al., 2014; Aiken and Picton, 2008; Petersen et al., 2016), mutual information (Gross et al., 2014;

46 Zan et al., 2020; Kaufeld et al., 2020) and neural networks (Katthi et al., 2020; Accou et al., 2021), but these will not  
47 be discussed further.

48 Linear modelling within the neural tracking framework requires two inputs: neural responses in the form of single-  
49 channel or multi-channel EEG (or MEG) and one or more features that represent the stimulus (see section 1.4). In the  
50 neural tracking framework, relations between the EEG and the stimulus feature are modelled, to investigate how well  
51 the stimulus information is encoded in the neural activity. The framework allows linear modelling in two directions:  
52 reconstructing the feature from the EEG (backward decoding, section 1.2) and conversely, reconstructing the EEG  
53 from the feature (forward encoding, section 1.3). As will be discussed below, the two analyses provide different but  
54 complementary information about the neural tracking responses. It is also possible to model in both directions at the  
55 same time with canonical correlation analysis (CCA), as described by de Cheveigné et al. (2019).

### 56 *1.2. Backward modelling*

57 In backward modelling, one reconstructs the stimulus feature from a weighted sum of the EEG signals from the  
58 different recording channels and their time-shifted versions. The time-shifted versions are included to account for  
59 neural processing delays. This delay or latency is estimated at about 5-10 ms for auditory processing in the upper  
60 brain stem and at least 12-30 ms for processes in the primary auditory cortex (Tichko and Skoe, 2017; Brugge et al.,  
61 2009). Higher-order cortical processes that modulate the neural response, like attention and interpretation of the  
62 speech, occur with delays of 200 ms or more (for a review, see Martin et al., 2008).

63 The backward modelling procedure, visualised in panel A of Figure 1, typically includes a training and a testing  
64 phase. First, the weights that provide the optimal reconstruction are determined based on a training data set (time-  
65 shifted EEG + corresponding stimulus feature). Then those weights are applied to the EEG from a separate testing  
66 data set, resulting in a reconstructed stimulus feature for the test data. The reconstructed feature is correlated with the  
67 actual stimulus feature of the test data to determine the reconstruction accuracy. This indicates how well the stimulus  
68 information can be reconstructed from the EEG, i.e., how well the speech is tracked by the brain. Note that this  
69 analysis is only reliable if the testing data is completely separated from the training data set. By training and testing  
70 on the same data, large reconstruction accuracies can be obtained, but the model has likely over-fitted on particularities  
71 of the data and will not generalise well to new data.

72 The backward modelling approach is a powerful analysis tool since the information of multiple EEG channels (often  
73 32 or more) can be combined to predict a stimulus feature with often only one dimension (although multi-dimensional  
74 features are possible). However, this also means backward modelling is an ill-posed problem, complicated by linear  
75 dependency between EEG channels and their time-shifted versions, and therefore regularization is necessary to obtain  
76 a single solution (e.g. Hastie et al., 2001; Machens et al., 2004).

77 A disadvantage of backward modelling is that the weights are extraction patterns and these cannot and should not  
78 be interpreted to investigate the spatial pattern of the response (Haufe et al., 2014). One could assume that large

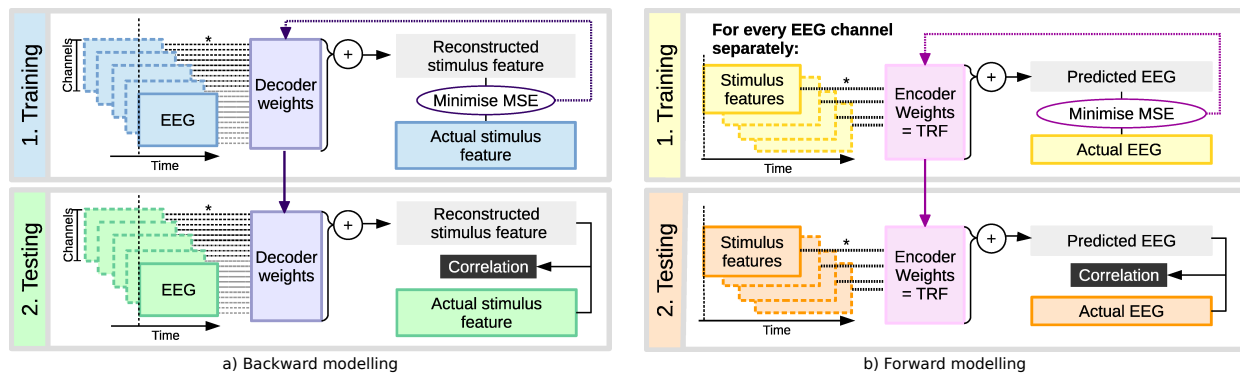

Figure 1: *A. Schematic representation of backward modelling.* In backward modelling, the stimulus feature is reconstructed based on a linear combination of time-shifted EEG data. In the training phase, the model is estimated by optimizing the decoder weights to minimize the MSE (mean squared error) between the reconstructed stimulus feature and the actual stimulus feature for a training data set. Then, in the testing phase, the weights are applied to reconstruct the stimulus feature for the testing dataset. The final output is the correlation between the reconstructed stimulus feature and the actual stimulus feature for the testing dataset. *B. Schematic representation of forward modelling.* In forward modelling, the EEG data in each EEG channel is predicted based on a linear combination of time-shifted stimulus features. Again, the encoder weights or TRFs (temporal response functions) are estimated by minimizing the reconstruction MSE for a training data set. Then the TRFs can be studied as is, or they can be used to predict the EEG for a testing data set. The output of the testing phase is the correlation between predicted EEG and the actual EEG.

79 weights mean that the corresponding EEG channels contain a lot of response information. However, when an EEG  
 80 channel captures information about a noise component, it can be used in the modelling process to 'subtract' the  
 81 noise component from other EEG channels. As a result, some channels may receive large weights because they are  
 82 helpful for noise reduction purposes and not because they contain response information (Montoya-Martínez et al.,  
 83 2021).

### 84 1.3. Forward modelling

85 Forward modelling can be used to study the spatio-temporal properties of the response: the EEG signal in each  
 86 channel is predicted from a weighted sum of the stimulus feature and its time shifted versions. Panel B of figure 1  
 87 schematically presents the forward modelling process. Note that for the forward modelling, the time-shifting occurs  
 88 in the opposite direction than for backward modelling. Each EEG channel is considered separately, causing forward  
 89 models to be less powerful, as they cannot combine information across channels. The advantage of this approach is  
 90 that the weights are activation patterns and not extraction patterns and can thus be interpreted. Forward modelling  
 91 may solely include a training phase, which results in interpretable weights (see below), or there may be a testing phase  
 92 where the weights are applied to predict the EEG for a separate data set. In that case, similar to the backward modeling  
 93 approach, the actual and predicted EEG responses can be correlated to obtain each EEG channel's prediction accuracy.  
 94 Higher prediction accuracies can be related to better encoding of the speech features in the EEG, and therefore in the  
 95 brain, but other factors that impact the SNR of the EEG could be at play as well.

96 For each channel, the weights estimated at the different time shifts form a temporal response function (TRF) that  
97 reflects response amplitude ( $\sim$  weight) as a function of response latency ( $\sim$  time shift). A TRF can be interpreted as  
98 the impulse response of the auditory system: the information in the input stimulus ( $\sim$  the feature) is transformed with  
99 this impulse response to produce the output response ( $\sim$  the EEG). The channel-specific TRFs tend to be noisy and  
100 are therefore often averaged over a selection of EEG channels and subjects. Based on the time shifts that receive large  
101 weights for many of the EEG channels/subjects, we can derive the dominant latencies of the response. These latencies  
102 (or delays) can then be used to estimate which stages of neural processing along the auditory pathway contribute to  
103 the response. The spatial properties of the response can be further investigated by looking at the spatial distribution  
104 of the magnitude of TRF weights over the scalp. This information is usually visualised on a topoplot. Examples of  
105 TRFs and topoplots are available in figure 3, which will be discussed further on. Note that such topoplots only allow  
106 for spatial information on scalp level, where the electrodes were located. To study the actual sources of the neural  
107 responses within the head, the inverse problem needs to be solved, i.e. transforming the information from electrode  
108 space to neural source space (e.g. Brodbeck et al., 2018c).

#### 109 *1.4. The stimulus feature*

110 The stimulus feature is derived from the presented speech and reflects how a particular speech characteristic varies  
111 over time. Many stimulus features can be used, ranging from low-level acoustic characteristics (e.g. the acous-  
112 tic envelope) to high-level linguistic information (e.g. word surprisal). This flexibility makes the neural tracking  
113 framework highly versatile. It also underlies one of the most prominent advantages of the framework: a single EEG  
114 measurement can be analysed with respect to various features of the stimulus and provides information on a range of  
115 auditory/language processes. This includes  $f_0$  tracking, envelope tracking, phoneme tracking, semantic tracking, etc.  
116 Since data collection is often time-intensive, this type of ‘multi-functional’ data and analysis can considerably speed  
117 up scientific progress and is also promising for clinical implementation.

118 We will focus on three prominent (groups of) stimulus features corresponding to three types of neural tracking analyses  
119 in the following sections. We discuss them following the hierarchical organisation of the auditory pathway: starting  
120 with auditory processing of the fundamental frequency ( $f_0$ , section 2), which happens mostly in subcortical stages  
121 of the auditory pathway, then moving on to envelope processing (section 3) which happens in the auditory cortex  
122 and ending with linguistic processing (section 4) which happens in the language network of the brain. We focus on  
123 how these stimulus features can be used to investigate different aspects of speech processing and different parts of the  
124 auditory pathway. Moreover, we provide example results and review findings from relevant studies, including how  
125 the responses relate to important clinical measures like hearing thresholds and speech perception.

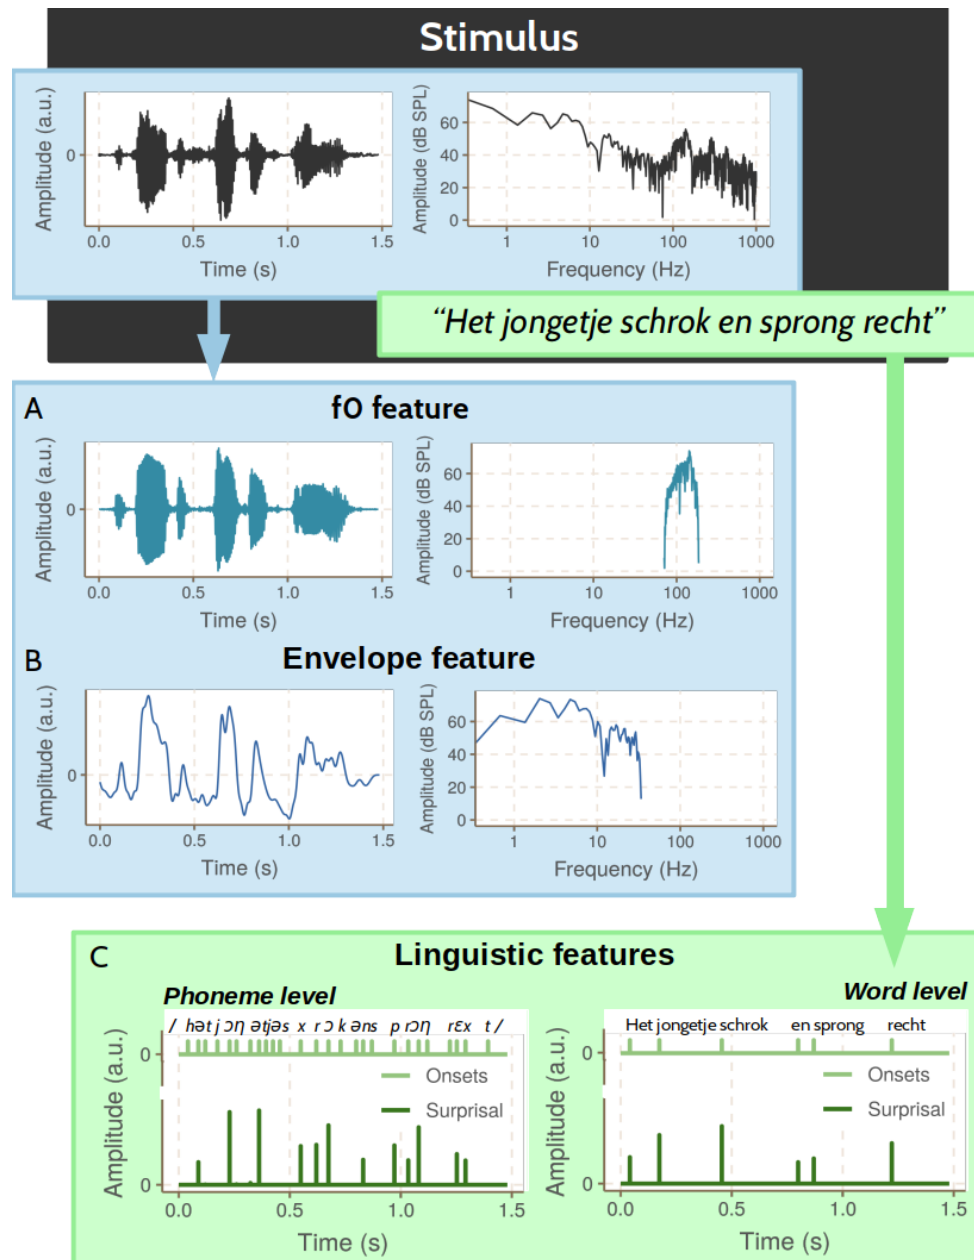

Figure 2: Example of stimulus and derived features for an example sentence by a male speaker. The f0 (panel A) and envelope feature (panel B) are derived from the stimulus waveform, whereas linguistic features (panel C) are derived from the stimulus transcription. The f0 and envelope features concern different spectral ranges with the envelope focusing on low frequencies (< 50 Hz) and the f0 focusing on higher frequencies (~ 85 – 300 Hz). Linguistic features can focus on different segmentation levels, including phoneme level and word level. Panel C visualises an example onset and surprisal feature for each level.

## 126 **2. Neural tracking of the f0**

127 Neural tracking of the fundamental frequency of the voice, or f0-tracking, is used to investigate how the f0 is rep-  
128 resented in the brain activity (Forte et al., 2017; Etard et al., 2019; Van Canneyt et al., 2021c). The f0 is a periodic  
129 modulation in the speech signal generated by vocal fold vibration during speech production. It is related to the per-  
130 ception of pitch. The f0 of adult speakers typically ranges from 85 to 300 Hz, with male and female voices situated  
131 respectively at the lower and higher ends of the range. The f0 is an essential characteristic of the human voice and  
132 it is vital to convey intonation and emotion, but proper perception of the f0 is not required for speech intelligibility  
133 (e.g. cochlear implant listeners). Nevertheless, f0-tracking can provide information on the quality of fine temporal  
134 processing in the early stages of the auditory pathway, which is the foundation for proper speech processing in the  
135 brain.

136 Temporal processing of the f0 in the human auditory system happens through the synchronization of the activity of  
137 the neurons to the f0 modulations, i.e. phase-locking. Due to the relatively high frequency of the f0 modulations, this  
138 phase-locking occurs mainly in peripheral and subcortical stages of the auditory pathway, up to the upper brain stem.  
139 Neurons at cortical stages have poor phase-locking above about 100 Hz and are therefore less likely to contribute to  
140 f0-tracking (Joris et al., 2004). However, it has been shown that early cortical contributions to f0-tracking responses  
141 (and FFRs) can occur for low-frequency stimuli (85-100 Hz, e.g. low male voices) (Coffey et al., 2016, 2017; Van  
142 Canneyt et al., 2021c).

143 F0 tracking analysis requires an f0 feature that represents the f0 modulations in the presented speech. The f0 feature  
144 can be extracted from the speech stimulus in various ways. A simple yet effective way is to band-pass filter the  
145 stimulus in the range of the f0 (Etard et al., 2019; Van Canneyt et al., 2021c). An example of this type of feature  
146 is provided in panel A of figure 2. More complicated and computationally expensive techniques have been explored  
147 as well, including empirical mode decomposition (Etard et al., 2019; Forte et al., 2017) and auditory modelling (Van  
148 Canneyt et al., 2021b). Constructing an f0 feature that approximates the expected neural response using auditory  
149 modelling has proven particularly effective, nearly doubling the reconstruction accuracies obtained with the neural  
150 tracking analysis (Van Canneyt et al., 2021b).

151 Section 1 of figure 3 shows the results of a typical forward modelling analysis for f0-tracking, obtained using the  
152 methods described in Van Canneyt et al. (2021c). The data set used for this visualisation (and all others in figure 3)  
153 contained 64-channel EEG data from 32 young normal-hearing subjects measured in response to male-narrated speech  
154 (dataset from Accou et al., 2021). Panel A shows the mean TRF across subjects for the channel selection indicated  
155 in pink on panel B. The TRF for each subject is plotted as well to indicate the variance. The TRFs in this example  
156 are modified with a Hilbert transform to present the amplitude of the TRF without phase information resulting in only  
157 positive values. This technique suppresses the auto-correlative periodicity in the f0-tracking TRFs (see further) and  
158 aids with interpretation (for more information, see Van Canneyt et al. (2021c)). The TRF pattern indicates that the

159 activity in the auditory system (~ EEG) best reflects the f0 information (~ the feature) at a latency of about 10-25 ms.  
160 Panel B of figure 3 presents an example f0 tracking topoplot with common-average rereferencing at 15 ms latency.  
161 The topoplot indicates strong response activity in the center of the head and across the back of the head. The temporal  
162 and spatial response patterns are consistent with dominant f0-related activity in the upper brain stem and early cortical  
163 regions. Saiz-Alia et al. (2020) has performed detailed computational modelling of the subcortical sources of the f0  
164 tracking response, demonstrating important contributions from the cochlear nuclei and the inferior colliculus. Van  
165 Canneyt et al. (2021c) argues for additional contributions from the right primary auditory cortex for f0 tracking of  
166 low-frequency voices.

167 Although f0-tracking was only recently developed, the technique has led to several interesting findings. Forte et al.  
168 (2017) and Etard et al. (2019) have demonstrated that the f0 tracking response holds information on selective attention,  
169 possibly indicating that neural mechanisms for attention influence the brain stem. Kulasingham et al. (2020) and  
170 Van Canneyt et al. (2021a) have investigated how the age of the listener impacts f0 tracking. Kulasingham et al.  
171 (2020) found no age effects using MEG, which is most sensitive to cortical sources. In contrast, Van Canneyt et al.  
172 (2021a) found a significant reduction in response strength with advancing age using EEG (which is more sensitive  
173 to subcortical sources). This observation is in line with an age-related decrease in the phase-locking ability of the  
174 subcortical (and early cortical) auditory system. Van Canneyt et al. (2021a) also studied the effect of hearing loss and  
175 found increased f0-tracking responses in participants with hearing impairment compared to age-matched controls. The  
176 response enhancement was due to additional cortical activity phase-locked to the f0 (with latency of ~40 ms), likely  
177 compensating for the reduced quality of bottom-up auditory input due to diminished peripheral auditory sensitivity.  
178 Moreover, the amount of additional compensatory cortical activity was significantly related to the pure tone average  
179 (PTA) hearing loss of the participant. As such, a significant relation exists between the degree of hearing loss of an  
180 individual and the strength of their f0 tracking response.

181 At the moment, f0-tracking also has some limitations, which future advances may mitigate. One of the main issues is  
182 auto-correlative smearing in TRFs and topoplots because the f0 stays relatively steady over multiple f0 periods. This  
183 periodic smearing over latencies can be somewhat mitigated with Hilbert-transformed TRFs, which disregard phase  
184 information. However, TRF and topoplot interpretation are still limited to the most dominant peaks (see Van Canneyt  
185 et al. (2021c) for more details). A second limitation is that the f0 is only present in speech during voiced sounds  
186 (~ 50-60 % of the time) and not during unvoiced sounds (~ 40 % of the time), including silences. During analysis,  
187 these unvoiced sections in the speech stimulus (and corresponding sections in the EEG) are disregarded. As a result  
188 only about half of the measured data can be used to analyse f0-tracking, increasing the required measurement time.  
189 Another limitation is that the f0 tracking response is reduced for voices with higher and more variable f0, leading to  
190 weak and often non-significant responses for typical female voices. This occurs because neural phase-locking ability  
191 is decreased for higher and more variable f0s, especially for cortical sources. As such, the stimulus choice has a large  
192 impact on the f0 tracking response. A final limitation is that f0-tracking requires careful interpretation: f0-tracking



193 reflects the capability of the auditory system to phase-lock to the  $f_0$ , but it does not reflect the ability of a person  
194 to perceive pitch or speech in general. Fortunately, neural tracking analyses with other features help complete the  
195 picture.

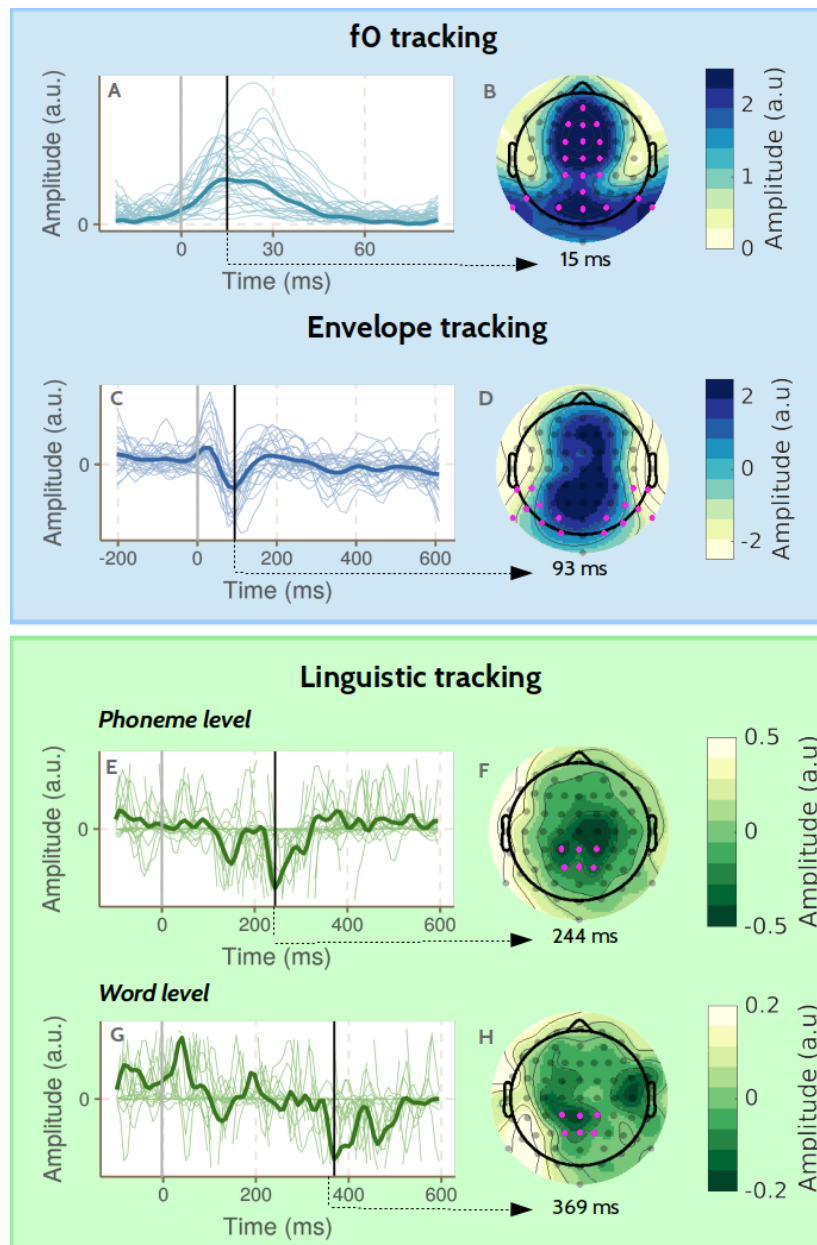

Figure 3: Example of forward modelling results: TRFs and topoplots. The figure is divided into three sections on f0-tracking, envelope tracking and linguistic tracking, respectively. For each type of tracking, an example mean TRF (+ individual TRFs) is presented (panel A, C, E and G), together with a corresponding topoplot at an important latency (panel B, D, F and H). The channels indicated with pink on the topoplot represent the channel selection used to obtain the corresponding TRF. Note the drastically different time scales in the TRFs, reflecting the presence of neural activity at different latencies for each feature.

### 196 **3. Neural tracking of the speech envelope**

197 The speech envelope consists of slow-varying modulations ( $< 50$  Hz) in the speech signal. It contains acoustic  
198 temporal information (Rosen, 1992) but also reflects phonemes, syllables and word transitions (Peelle and Davis,  
199 2012). Moreover, it also correlates with the area of the mouth opening during articulation (Chandrasekaran et al.,  
200 2009). Therefore it is not surprising that research indicates that the envelope is an essential acoustic cue for speech  
201 intelligibility (Shannon et al., 1995; Drullman et al., 1994a,b).

202 Envelope tracking is used to analyse the neural encoding of the speech envelope during speech perception (Ding and  
203 Simon, 2012a; O'Sullivan et al., 2015; Vanthornhout et al., 2018). From animal studies (Wang et al., 2008) and human  
204 studies with electrocochleography (ECoG), it is known that the speech envelope is processed in the primary auditory  
205 cortex, specifically in Heschl's Gyrus (Nourski et al., 2009). A growing body of evidence demonstrates envelope  
206 tracking is a requirement for speech understanding. Correspondingly, multiple studies show that neural tracking of  
207 the speech envelope is strongly correlated with behaviourally measured speech intelligibility (e.g. Ding et al. (2014);  
208 Vanthornhout et al. (2018); Lesenfants et al. (2019); Iotzov and Parra (2019); Verschueren et al. (2021)). As a specific  
209 example, Vanthornhout et al. (2018) found a significant correlation of 0.69 between the speech reception threshold  
210 (SRT) estimated based on envelope tracking and the SRT measured with behavioural speech audiometry.

211 Although the full-band envelope can be used, it is also possible to study the neural response to specific frequency  
212 bands of the envelope. Envelope tracking responses are most commonly investigated in the delta band (0.5-4 Hz),  
213 theta band (4-8 Hz) and gamma band ( $> 30$  Hz) (Ding and Simon, 2013; Verschueren et al., 2021; Molinaro and  
214 Lizarazu, 2017). The lower envelope frequencies are often the main interest as they correspond with word onsets and  
215 the syllabic rate of the speech, which is hypothesised to be crucial for speech intelligibility. Some studies suggest that  
216 speech intelligibility is specifically related to the theta band (4-8 Hz) and not the delta band (1-4 Hz) (Ding and Simon,  
217 2013). Other studies indicate the opposite (Verschueren et al., 2021; Molinaro and Lizarazu, 2017). In our opinion,  
218 the outcome may depend on the speech material. The syllabic rate is often very close to 4 Hz, and as such, envelope  
219 tracking to a slow speaker could be more dominant in the delta band while envelope tracking to a fast speaker could  
220 be more dominant in the theta band.

221 Envelope tracking responses can be analysed using a forward, backward or bidirectional model. In any case, the model  
222 requires an envelope feature that is extracted from the stimulus waveform. In essence, the envelope is just a curve  
223 outlining the peak values of the stimulus, which can be easily obtained by taking the absolute value of the Hilbert  
224 transform. Although this is a prevalent method, it is not the best choice as it disregards human perception. To better  
225 approximate human envelope perception, two important aspects of auditory processing need to be taken into account.  
226 First, the stimulus should be split into frequency bands before the actual envelope extraction process to mimic how  
227 the basilar membrane in the cochlea divides a sound stimulus into different auditory filters. Second, the compression  
228 and non-linear behaviour of the auditory system should be accounted for. To incorporate these factors in the envelope

229 extraction process, complex computational models of the auditory periphery can be used (Yang et al., 2015; Bruce  
230 et al., 2018). However, Biesmans et al. (2017) evaluated various extraction methods in an auditory attention detection  
231 paradigm and proposed a simplified approach. They found that a combination of a gammatone filterbank, which  
232 simulates the auditory filters on the basilar membrane, followed by a power law to account for compression and non-  
233 linearity in the auditory system, performed equally well as the more complex and computationally expensive auditory  
234 models. Although AAD is not the same as envelope tracking, the underlying model is identical and the proposed  
235 technique is valid here as well. An example envelope feature obtained using this technique is provided in panel B of  
236 figure 2.

237 A visualisation of the results of a typical forward modelling analysis for envelope tracking is visualised in section 2 of  
238 figure 3. These results were obtained by applying the methods described in Vanthornhout et al. (2019) and Lesenfants  
239 et al. (2019) to the data set described earlier. Panel C presents the mean TRF, averaged over subjects and a channel  
240 selection (indicated in pink on panel D). The TRFs of the individual subjects are visualised with a thin line to indicate  
241 the variance. The TRF displays three distinct peaks. The P1 peak (50 ms), the N1 peak (93 ms) and the P2 peak (170  
242 ms). This typical P1-N1-P2 complex is also found in AEP studies with impulse-like stimuli and can thus be used  
243 to infer the neural source of the peaks. The P1 peak originates in Heschl's Gyrus, and the N1 peak originates in the  
244 Superior Temporal Gyrus (O'Sullivan et al., 2019b; Steinschneider et al., 2011). The origin of the P2 peak is less  
245 clear but is probably in the (higher) auditory cortex (Godey et al., 2001). The topoplot shows negative weights for the  
246 temporal channels and positive weights for the central channels. This distribution is an indication of a dipole located  
247 near the auditory cortex. Without analyses in source space, the exact location is difficult to pinpoint.

248 Over the past decade, envelope tracking has been used to study, among others, how cortical speech processing is  
249 affected by individual factors like age and hearing status. Decruy et al. (2019) and Brodbeck et al. (2018b) found  
250 stronger envelope tracking for older participants compared to younger participants, even though older adults typi-  
251 cally have more difficulty understanding speech. Similarly, Decruy et al. (2020b) and Fuglsang et al. (2020) found  
252 increased envelope tracking for hearing-impaired listeners compared to age-matched normal-hearing listeners. The  
253 enhanced tracking in older listeners or listeners with a hearing impairment may be explained by a compensatory cen-  
254 tral gain mechanism (Parthasarathy et al., 2019; De Villers-Sidani et al., 2010; Chambers et al., 2016), recruitment of  
255 additional cortical resources (Brodbeck et al., 2018b; Gillis et al., 2021a) and increased listening effort and attention  
256 (Decruy et al., 2020a; Vanthornhout et al., 2019; Lesenfants and Francart, 2020). With an innovative artefact removal  
257 technique, Somers et al. (2019) succeeded to analyse envelope tracking for cochlear implant listeners as well. For  
258 both hearing-impaired listeners (with simulated amplification) (Decruy et al., 2020b) and cochlear implant listeners  
259 (Verschueren et al., 2019) the tracking strength was significantly correlated to behaviourally-measured speech intelli-  
260 gibility, indicating a similar relation with speech intelligibility as observed for normal hearing listeners (Vanthornhout  
261 et al., 2018).

262 One challenge with envelope tracking is that its functional interpretation is unclear. The main complicating factor is

263 that the envelope itself is highly correlated with linguistic cues, like the onsets of words and syllables. As such, the  
264 envelope represents multiple unique features that all may contribute to the observed neural tracking response and are  
265 hard to disentangle. In addition, the interpretation of envelope tracking is complicated by the fact that it is modulated  
266 by top-down effects, such as attention and audio-visual integration (O’Sullivan et al., 2019a). A final challenge is that  
267 the exact relation between envelope tracking and speech intelligibility remains a point of discussion (Ding and Simon,  
268 2014; Brodbeck and Simon, 2020). Multiple studies have shown that envelope tracking reflects experimental changes  
269 in speech intelligibility (Vanthornhout et al., 2018; Lesenfants et al., 2019; Verschueren et al., 2021), even in the case  
270 of degraded speech with an intact envelope (Ding et al., 2014). However, it is unlikely that envelope tracking is a  
271 direct reflection of successful speech intelligibility as neural tracking responses have been observed for non-speech  
272 signals (Zuk et al., 2021) and foreign languages (Etard and Reichenbach, 2019). As such, envelope tracking is likely  
273 necessary but not sufficient for speech intelligibility. To gain further insight into how the brain processes the meaning  
274 of speech, i.e. speech intelligibility, linguistic features can be used.

#### 275 **4. Neural tracking of linguistic features**

276 In pursuit of an accurate neural marker of speech intelligibility, recent studies focus on linguistic speech features.  
277 While the  $f_0$  and speech envelope are derived from the acoustic waveform of the speech, linguistic features are derived  
278 from the content of the speech. Proper encoding of these features in the brain requires accurate linguistic processing  
279 and not mere acoustic processing.

280 Linguistic features can be divided in two categories. Features in the first category denote lexical segmentation. They  
281 represent (aspects of) a sequence of small building blocks that make up spoken language, e.g., sequences of phonemes,  
282 phonetic features, words, or specific word categories like content and function words (Di Liberto et al., 2015; Lesen-  
283 fans et al., 2019). These features are arrays consisting of zeros with a fixed, non-zero entry ( $\sim$  spike) at the onset  
284 of each lexical building block (see features in light green on Panel C of figure 2). Features in the second category  
285 reflect higher-level linguistic aspects of the speech, e.g., how familiar, predictable or surprising a word or phoneme  
286 is in its context (Weissbart et al., 2019; Brodbeck et al., 2018a; Koskinen et al., 2020). These features can be applied  
287 on three levels, which require different amounts of linguistic context: (1) at the level of a phoneme (e.g., phoneme  
288 surprisal or cohort entropy), (2) at the level of a word (e.g., word frequency or word surprisal), and (3) at a semantic  
289 contextual level (e.g., semantic dissimilarity). These features consist of arrays of zeroes and ones, similar to lexical  
290 segmentation features. However, in this case the spike amplitude at each onset is not fixed but modulated by the  
291 linguistic information of the specific phoneme or word (see features in dark green on Panel C of figure 2).

292 The fact that linguistic features are sparse arrays consisting of mostly zeroes with some non-zero entries ( $\sim$  spikes),  
293 makes them different from the continuous  $f_0$  and envelope features and poses challenges for response analysis. In  
294 backward modelling the reconstructed feature needs to be compared to the actual feature but traditional measures to  
295 do so, like MSE or correlation, are not well-behaved with sparse inputs. These problems do not occur for forward

296 modelling, where the non-sparse reconstructed and actual EEG are compared. Therefore the forward model is a more  
297 common choice for analysis with linguistic features.

298 Panels E-H of figure 3 present a visualisation of the results of a typical forward modelling analysis for linguistic  
299 tracking with phoneme surprisal and word surprisal features (see Brodbeck et al., 2018a; Gillis et al., 2021b, for detailed  
300 methods). The TRFs at both phoneme (panel E) and word level (panel G) show a negative response, situated centrally  
301 in the topography (panel F and H), around respectively 250 and 350 ms. The earlier response peak for phonemes  
302 compared to words is consistent with the hierarchy of the language processing of these linguistic building blocks, i.e.,  
303 the phonemes making up a word are processed before the word's surprisal can be estimated. Moreover, the response  
304 to word surprisal resembles the N400 response, which is classically observed in ERP paradigms (Lau et al., 2008).  
305 These congruent topographic responses indicate that this small and specific language response can also be observed  
306 when listening to natural running speech rather than stand-alone sentences.

307 Measuring neural tracking of linguistic features is an exciting avenue to test psycho-linguistic theories of speech  
308 understanding. It is accepted that listeners use linguistic context to continuously adapt expectations of upcoming  
309 concepts, words and phonemes, but it is unclear how these expectations are integrated with what is actually being  
310 perceived. Brodbeck et al. (2021) showed that the neural prediction of an upcoming phoneme or word relies on  
311 contextual processing in a parallel manner, combining both bottom-up and top-down processing. Additional evidence  
312 of the presence of top-down processing comes from Heilbron et al. (2020) who observed that higher-level predictions  
313 influence the predictions at lower levels (i.e., word prediction affects the predictions at phoneme level).

314 Another exciting research path is the disentanglement of acoustic and linguistic neural processing. Verschueren et al.  
315 (2022) disentangled acoustic and linguistic neural processing by changing the speech rate, which kept the linguistic  
316 content the same while varying the acoustic properties and the intelligibility of the speech. As the speech rate became  
317 higher, the neural tracking of acoustic properties increased. This means that better neural encoding was observed,  
318 even though the speech became harder to understand. In contrast, neural tracking of linguistic properties decreased  
319 with increasing speech rate. This indicates that linguistic tracking provides a more accurate objective measure for  
320 speech intelligibility.

321 Linguistic speech representations can also provide insight into age-related speech intelligibility deficits. We are aware  
322 of two studies that study the speech intelligibility deficits in older adults. Although Mesik et al. (2021) did not  
323 report differences, Broderick et al. (2021) reported that older adults rely less on pre-activated semantic representations  
324 than younger adults. Furthermore, they showed that older adults who relied more on this semantic pre-activation  
325 mechanism showed higher verbal fluency. Please note that due to the novelty of linguistic tracking, many of the  
326 studies mentioned here have not yet passed peer review.

327 Linguistic tracking is an up-and-coming research technique but it also has a few difficulties. Firstly, the linguistic  
328 representations coincide with the boundaries of phonemes and words. These boundaries are often associated with high

329 acoustic power, and therefore, it is necessary to carefully control for acoustic properties of the speech when evaluating  
330 linguistic representations. If not, the speech tracking analysis might be biased to find spurious significant linguistic  
331 representations due to its correlations with acoustic representations (Daube et al., 2019). One way to overcome this  
332 issue is by investigating the added value of linguistic representations (as used in e.g. Broderick et al., 2018; Gillis  
333 et al., 2021b). Such an approach requires two model fits: a baseline model, accounting for acoustic and lexical  
334 segmentation features, and a more complex model that includes linguistic information on top of the baseline model.  
335 The performance (i.e., prediction accuracy) of the baseline model is then subtracted from the performance of the  
336 more complex model to obtain the added value of linguistic representations. Note that this approach is conservative  
337 and restrictive: it only quantifies unique information contributed to the model by the linguistic features, neglecting  
338 acoustic and linguistic information that is shared with other features in the model.

339 Secondly, due to sparse features, the analyses are often based on forward modelling. Prediction accuracies, i.e.  
340 correlations, obtained with forward models are typically small in magnitude: only around 3 to 7% of the variance  
341 in the EEG signal can be explained by neural responses time-locked to the presented stimulus. Moreover, most  
342 of this variance is explained by acoustic characteristics of the speech, as these lower-level acoustic representations  
343 evoke responses over large parts of the auditory system. In contrast, linguistic tracking targets the neural response  
344 from a precisely localized neural process related to intelligibility. Therefore, the associated magnitudes of these neural  
345 processes measured at the scalp level are much smaller. As the prediction accuracies of the forward model are small in  
346 magnitude, finding a significant improvement of the linguistic representation over and beyond acoustic representations  
347 is statistically challenging (e.g. an improvement of ~1% corresponds to an increase in prediction accuracy of  $3.4 \times 10^{-4}$   
348 using the conservative and restrictive approach as described above Gillis et al. (2021b)).

## 349 **5. Clinical applications of neural tracking responses**

350 To provide people with hearing problems with evidence-based and innovative health care, it is useful to review the  
351 merits and limitations of all (objective) audiological measures and investigate how the measures may be combined to  
352 form a complete assessment.

353 The current gold standard methods, i.e. tone and speech audiometry, have proven their worth but they are challenging  
354 in key patient populations like young children. To remedy this, objective measures for sound perception like the ABR  
355 and the ASSR have been introduced in the clinical toolset. However, there is no clinically available objective measure  
356 of speech intelligibility. Since speech intelligibility is the basis for human communication, this is a significant gap to  
357 fill. Various populations may benefit from such a measure, including young children, stroke patients (especially those  
358 with aphasia) and people with dementia.

359 The versatile neural tracking paradigm is highly promising for this purpose: based on a single twenty-minute long  
360 EEG recording, a wide range of speech processing abilities may be assessed (incl. phase locking to the  $f_0$ , envelope

361 tracking, phonetic processing, phonemic processing and even linguistic processing). This versatility may lead to a  
362 highly time-effective objective assessment of both auditory and language abilities. Moreover, neural tracking is easily  
363 automated, paving the way to improved automated screening, diagnostics, and automatic fitting of auditory prostheses,  
364 or even auditory prostheses that continuously adapt themselves to the listener based on their brain activity (Geirnaert  
365 et al., 2021).

366 Future studies preparing for clinical implementation may need to shift focus from group-level analyses towards  
367 subject-specific analyses. Moreover, they may focus on which combination of neural tracking features provides  
368 the most information and how these can be optimally analysed. As the features are highly correlated with each other,  
369 special care needs to be taken to investigate the effect of each feature (Gillis et al., 2021b). Subsequent research efforts  
370 are also required to decide on the best speech stimuli (required to work well for all types of tracking) and the best EEG  
371 measurement set-up, including the number of EEG electrodes and their position (Montoya-Martínez et al., 2021). It is  
372 also essential to validate the measures in a comprehensive sample of the population, including participants of all ages  
373 and with various audiological and non-audiological pathologies. Furthermore, the neural tracking results need to be  
374 transformed into an easy-to-interpret set of scores and visualisations, to allow for intuitive use by clinicians.

## 375 **6. Acknowledgements**

376 The authors would like to thank Bernd Accou, Wendy Verheijen and their students for collecting the dataset used for  
377 the examples in this article. The research received funding from the European Research Council under the European  
378 Unions Horizon 2020 research and innovation programme (grant agreement No. 637424, ERC starting grant to Tom  
379 Francart). Jana Van Canneyt and Marlies Gillis are both supported by a PhD grant for Strategic Basic research by  
380 the Research Foundation Flanders (FWO): project number 1S83618N and project number 1SA0620N, respectively.  
381 Jonas Vanthornhout is funded by a postdoctoral grant from FWO, project number 1290821N.

## 382 **7. Declaration of interest**

383 The authors declare that author Tom Francart is involved in translational research which may lead to the commer-  
384 cialisation of a product related to the presented research. Besides this, there are no conflicts of interest, financial, or  
385 otherwise.

## 386 **References**

- 387 Accou, B., Jalilpour Monesi, M., Montoya, J., Van hamme, H., and Francart, T. (2021). Modeling the relationship between acoustic stimulus and  
388 EEG with a dilated convolutional neural network. In *2020 28th European Signal Processing Conference (EUSIPCO)*, pages 1175–1179.
- 389 Aiken, S. J. and Picton, T. W. (2008). Human cortical responses to the speech envelope. *Ear and Hearing*, 29(2):139–157.
- 390 Biesmans, W., Das, N., Francart, T., and Bertrand, A. (2017). Auditory-Inspired Speech Envelope Extraction Methods for Improved EEG-Based  
391 Auditory Attention Detection in a Cocktail Party Scenario. *IEEE Transactions on Neural Systems and Rehabilitation Engineering*, 25(5):402–  
392 412.

- 393 Bourguignon, M., Molinaro, N., Lizarazu, M., Taulu, S., Jousmäki, V., Lallier, M., Carreiras, M., and De Tiège, X. (2020). Neocortical activity  
394 tracks the hierarchical linguistic structures of self-produced speech during reading aloud. *NeuroImage*, 216(September 2019).
- 395 Brodbeck, C., Bhattasali, S., Heredia, A. C., Resnik, P., Simon, J. Z., and Lau, E. (2021). Parallel processing in speech perception: Local and  
396 global representations of linguistic context. *bioRxiv*, page 2021.07.03.450698.
- 397 Brodbeck, C., Hong, L. E., and Simon, J. Z. (2018a). Rapid Transformation from Auditory to Linguistic Representations of Continuous Speech.  
398 *Current Biology*, 28(24):3976–3983.e5.
- 399 Brodbeck, C., Presacco, A., Anderson, S., and Simon, J. Z. (2018b). Over-representation of speech in older adults originates from early response  
400 in higher order auditory cortex. *Acta Acustica united with Acustica*, 104(5):774–777.
- 401 Brodbeck, C., Presacco, A., and Simon, J. Z. (2018c). Neural Source Dynamics of Brain Responses to Continuous Stimuli: {{Speech}} Processing  
402 from Acoustics to Comprehension. *NeuroImage*, 172:162–174.
- 403 Brodbeck, C. and Simon, J. Z. (2020). Continuous speech processing. *Current Opinion in Psychology*, 18:25–31.
- 404 Broderick, M. P., Anderson, A. J., Di Liberto, G. M., Crosse, M. J., and Lalor, E. C. (2018). Electrophysiological Correlates of Semantic  
405 Dissimilarity Reflect the Comprehension of Natural, Narrative Speech. *Current Biology*, 28(5).
- 406 Broderick, M. P., Di Liberto, G. M., Anderson, A. J., Rofes, A., and Lalor, E. C. (2021). Dissociable electrophysiological measures of natural  
407 language processing reveal differences in speech comprehension strategy in healthy ageing. *Scientific Reports*, 11(1):1–12.
- 408 Bruce, I. C., Erfani, Y., and Zilany, M. S. (2018). A phenomenological model of the synapse between the inner hair cell and auditory nerve:  
409 Implications of limited neurotransmitter release sites. *Hearing Research*, 360:40–54.
- 410 Brugge, J. F., Nourski, K. V., Oya, H., Reale, R. A., Kawasaki, H., Steinschneider, M., and Howard, M. A. (2009). Coding of Repetitive Transients  
411 by Auditory Cortex on Heschl’s Gyrus. *Journal of Neurophysiology*, 102(4):2358–2374.
- 412 Chambers, A. R., Resnik, J., Yuan, Y., Whitton, J. P., Edge, A. S., Liberman, M. C., and Polley, D. B. (2016). Central Gain Restores Auditory  
413 Processing following Near-Complete Cochlear Denervation. *Neuron*, 89(4):867–879.
- 414 Chandrasekaran, C., Trubanova, A., Stillitano, S., Caplier, A., and Ghazanfar, A. A. (2009). The natural statistics of audiovisual speech. *PLoS*  
415 *Computational Biology*, 5(7).
- 416 Coffey, E. B., Musacchia, G., and Zatorre, R. J. (2017). Cortical Correlates of the Auditory Frequency-Following and Onset Responses: EEG and  
417 fMRI Evidence. *The Journal of Neuroscience*, 37(4):830–838.
- 418 Coffey, E. B. J., Herholz, S. C., Chepesiuk, A. M. P., Baillet, S., and Zatorre, R. J. (2016). Cortical contributions to the auditory frequency-following  
419 response revealed by MEG. *Nature Communications*, 7:11070.
- 420 Crosse, M. J., Di Liberto, G. M., Bednar, A., and Lalor, E. C. (2016). The multivariate temporal response function (mTRF) toolbox: A MATLAB  
421 toolbox for relating neural signals to continuous stimuli. *Frontiers in Human Neuroscience*, 10(NOV2016).
- 422 Daube, C., Ince, R. A., and Gross, J. (2019). Simple Acoustic Features Can Explain Phoneme-Based Predictions of Cortical Responses to Speech.  
423 *Current Biology*, 29(12):1924–1937.e9.
- 424 de Cheveigné, A., Di Liberto, G. M., Arzounian, D., Wong, D. D., Hjortkjær, J., Fuglsang, S., and Parra, L. C. (2019). Multiway canonical  
425 correlation analysis of brain data. *NeuroImage*, 186(November 2018):728–740.
- 426 De Villers-Sidani, E., Alzghoul, L., Zhou, X., Simpson, K. L., Lin, R. C., and Merzenich, M. M. (2010). Recovery of functional and structural  
427 age-related changes in the rat primary auditory cortex with operant training. *Proceedings of the National Academy of Sciences of the United*  
428 *States of America*, 107(31):13900–13905.
- 429 Decrui, L., Lesenfants, D., Vanthornhout, J., and Francart, T. (2020a). Top-down modulation of neural envelope tracking: The interplay with  
430 behavioral, self-report and neural measures of listening effort. *European Journal of Neuroscience*, European J(October 2019):3375–3393.
- 431 Decrui, L., Vanthornhout, J., and Francart, T. (2019). Evidence for enhanced neural tracking of the speech envelope underlying age-related  
432 speech-in-noise difficulties. *Journal of Neurophysiology*, 122(2):601–615.
- 433 Decrui, L., Vanthornhout, J., and Francart, T. (2020b). Hearing impairment is associated with enhanced neural tracking of the speech envelope.  
434 *Hearing Research*, 393:107961.
- 435 Di Liberto, G. M., O’Sullivan, J. A., and Lalor, E. C. (2015). Low-frequency cortical entrainment to speech reflects phoneme-level processing.



- 436 *Current Biology*, 25(19):2457–2465.
- 437 Ding, N., Chatterjee, M., and Simon, J. Z. (2014). Robust cortical entrainment to the speech envelope relies on the spectro-temporal fine structure.  
438 *NeuroImage*, 88:41–46.
- 439 Ding, N. and Simon, J. Z. (2012a). Emergence of Neural Encoding of Auditory Objects While Listening to Competing Speakers. *PNAS*,  
440 109(29):11854–11859.
- 441 Ding, N. and Simon, J. Z. (2012b). Neural coding of continuous speech in auditory cortex during monaural and dichotic listening. *Journal of*  
442 *Neurophysiology*, 107(1):78–89.
- 443 Ding, N. and Simon, J. Z. (2013). Adaptive temporal encoding leads to a background-insensitive cortical representation of speech. *Journal of*  
444 *Neuroscience*, 33(13):5728–5735.
- 445 Ding, N. and Simon, J. Z. (2014). Cortical entrainment to continuous speech: Functional roles and interpretations. *Frontiers in Human Neuro-*  
446 *science*, 8(MAY):1–7.
- 447 Drullman, R., Festen, J. M., and Plomp, R. (1994a). Effect of Reducing Slow Temporal Modulations on Speech Reception. *The Journal of the*  
448 *Acoustical Society of America*, 95(5):2670–2680.
- 449 Drullman, R., Festen, J. M., and Plomp, R. (1994b). Effect of Temporal Envelope Smearing on Speech Reception. *The Journal of the Acoustical*  
450 *Society of America*, 95(2):1053–1064.
- 451 Etard, O., Kegler, M., Braiman, C., Forte, A. E., and Reichenbach, T. (2019). Decoding of selective attention to continuous speech from the human  
452 auditory brainstem response. *NeuroImage*, 200(May):1–11.
- 453 Etard, O. and Reichenbach, T. (2019). Neural Speech Tracking in the Theta and in the Delta Frequency Band Differentially Encode Clarity and  
454 Comprehension of Speech in Noise. *The Journal of neuroscience : the official journal of the Society for Neuroscience*, 39(29):5750–5759.
- 455 Forte, A. E., Etard, O., and Reichenbach, T. (2017). The human auditory brainstem response to running speech reveals a subcortical mechanism  
456 for selective attention. *eLife*, 6:1–13.
- 457 Fuglsang, S. A., Mårcher-Rørsted, J., Dau, T., and Hjørtkjær, J. (2020). Effects of sensorineural hearing loss on cortical synchronization to  
458 competing speech during selective attention. *Journal of Neuroscience*, 40(12):2562–2572.
- 459 Geirnaert, S., Vandecappelle, S., Alickovic, E., de Cheveigne, A., Lalor, E., Meyer, B., Miran, S., Francart, T., and Bertrand, A. (2021).  
460 Electroencephalography-based Auditory Attention Decoding : Toward Neuro-Steered Hearing Devices. *Ieee Signal Processing Magazine*.  
461 *Special issue on Signal Processing for Neurorehabilitation and Assistive Technologies*, 38(4):89–102.
- 462 Gillis, M., Decruy, L., Vanthornhout, J., and Francart, T. (2021a). Hearing loss is associated with delayed neural responses to continuous speech.  
463 *bioRxiv*, 2021.01.21.
- 464 Gillis, M., Vanthornhout, J., Simon, J. Z., Francart, T., and Brodbeck, C. (2021b). Neural markers of speech comprehension: measuring EEG  
465 tracking of linguistic speech representations, controlling the speech acoustics. *The Journal of Neuroscience*, (October):JN–RM–0812–21.
- 466 Godey, B., Schwartz, D., de Graaf, J. B., Chauvel, P., and Liégeois-Chauvel, C. (2001). Neuromagnetic source localization of auditory evoked  
467 fields and intracerebral evoked potentials: a comparison of data in the same patients. *Clinical Neurophysiology*, 112(10):1850–1859.
- 468 Gross, J., Hoogenboom, N., Thut, G., Schyns, P., Panzeri, S., Belin, P., and Garrod, S. (2014). Speech Rhythms and Multiplexed Oscillatory  
469 Sensory Coding in the Human Brain. *PLOS Biology*, 11(12):1–14.
- 470 Hamilton, L. S. and Huth, A. G. (2018). The revolution will not be controlled: natural stimuli in speech neuroscience. *Language, Cognition and*  
471 *Neuroscience*, 35(5):573–582.
- 472 Hastie, T., Tibshirani, R., and Friedman, J. (2001). *The Elements of Statistical Learning*. Springer, New York.
- 473 Haufe, S., Meinecke, F., Görgen, K., Dähne, S., Haynes, J.-D. D., Blankertz, B., and Bießmann, F. (2014). On the interpretation of weight vectors  
474 of linear models in multivariate neuroimaging. *NeuroImage*, 87:96–110.
- 475 Heilbron, M., Armeni, K., Schoffelen, J.-M., Hagoort, P., and De Lange, F. P. (2020). A hierarchy of linguistic predictions during natural language  
476 comprehension. *bioRxiv*, page 2020.12.03.410399.
- 477 Iotzov, I. and Parra, L. C. (2019). EEG can predict speech intelligibility. *Journal of Neural Engineering*, 16(3):036008.
- 478 Joris, P. X., Schreiner, C. E., and Rees, A. (2004). Neural Processing of Amplitude-Modulated Sounds. *Physiological Reviews*, 84(2):541–577.

- 479 Katthi, J. R., Ganapathy, S., Kothinti, S., and Slaney, M. (2020). Deep Canonical Correlation Analysis for Decoding the Auditory Brain. *Proceed-*  
480 *ings of the Annual International Conference of the IEEE Engineering in Medicine and Biology Society, EMBS*, 2020-July:3505–3508.
- 481 Kaufeld, G., Bosker, H. R., Alday, P. M., Meyer, A. S., and Martin, A. E. (2020). Structure and meaning organize neural oscillations into a  
482 content-specific hierarchy. *bioRxiv*, 40(49):9467–9475.
- 483 Kei, J., Smyth, V., Murdoch, B., and McPherson, B. (1999). Measuring the Understanding of Connected Discourse: An Overview of Methodology  
484 and Clinical Applications in Rehabilitative Audiology. *Asia Pacific Journal of Speech, Language and Hearing*, 4(1):13–37.
- 485 Keidser, G., Naylor, G., Brungart, D. S., Caduff, A., Campos, J., Carlile, S., Carpenter, M. G., Grimm, G., Hohmann, V., Holube, I., Launer, S.,  
486 Lunner, T., Mehra, R., Rapport, F., Slaney, M., and Smeds, K. (2020). The Quest for Ecological Validity in Hearing Science: What It Is, Why  
487 It Matters, and How to Advance It. *Ear and hearing*, 41:5S–19S.
- 488 Kong, Y.-Y., Mullangi, A., and Ding, N. (2014). Differential Modulation of Auditory Responses to Attended and Unattended Speech in Different  
489 Listening Conditions. *Hearing Research*, 316:73–81.
- 490 Koskinen, M., Kurimo, M., Gross, J., Hyvärinen, A., and Hari, R. (2020). Brain activity reflects the predictability of word sequences in listened  
491 continuous speech: Brain activity predicts word sequences. *NeuroImage*, 219(May).
- 492 Kulasingham, J. P., Brodbeck, C., Presacco, A., Kuchinsky, S. E., Anderson, S., and Simon, J. Z. (2020). High gamma cortical processing of  
493 continuous speech in younger and older listeners. *NeuroImage*, 222(June):117291.
- 494 Lalor, E. C. and Foxe, J. J. (2010). Neural responses to uninterrupted natural speech can be extracted with precise temporal resolution. *European*  
495 *Journal of Neuroscience*, 31(1):189–193.
- 496 Lalor, E. C., Power, A. J., Reilly, R. B., and Foxe, J. J. (2009). Resolving Precise Temporal Processing Properties of the Auditory System Using  
497 Continuous Stimuli. *Journal of Neurophysiology*, 102(1):349–359.
- 498 Lau, E. F., Phillips, C., and Poeppel, D. (2008). A cortical network for semantics: (de)constructing the N400.
- 499 Lesenfants, D. and Francart, T. (2020). The interplay of top-down focal attention and the cortical tracking of speech. *Scientific Reports*, 10(1):1–11.
- 500 Lesenfants, D., Vanthornhout, J., Verschueren, E., Decruy, L., and Francart, T. (2019). Predicting individual speech intelligibility from the cortical  
501 tracking of acoustic- and phonetic-level speech representations. *Hearing Research*, 380:1–9.
- 502 Machens, C. K., Wehr, M. S., and Zador, A. M. (2004). Linearity of Cortical Receptive Fields Measured with Natural Sounds. *Journal of*  
503 *Neuroscience*, 24(5):1089–1100.
- 504 Martin, B. A., Tremblay, K. L., and Korczak, P. (2008). Speech evoked potentials: From the laboratory to the clinic. *Ear and Hearing*, 29(3):285–  
505 313.
- 506 Mesik, J., Ray, L., and Wojtczak, M. (2021). Effects of Age on Cortical Tracking of Word-Level Features of Continuous Competing Speech.  
507 *Frontiers in Neuroscience*, 15(April):1–21.
- 508 Molinaro, N. and Lizarazu, M. (2017). Delta(but Not Theta)-band Cortical Entrainment Involves Speech-specific Processing. *European Journal of*  
509 *Neuroscience*, 48(7).
- 510 Montoya-Martínez, J., Vanthornhout, J., Bertrand, A., and Francart, T. (2021). Effect of number and placement of EEG electrodes on measurement  
511 of neural tracking of speech. *PLoS ONE*, 16(2 February):1–18.
- 512 Nourski, K. V., Reale, R. A., Oya, H., Kawasaki, H., Kovach, C. K., Chen, H., Howard, M. A., and Brugge, J. F. (2009). Temporal Envelope of  
513 Time-Compressed Speech Represented in the Human Auditory Cortex. *Journal of Neuroscience*, 29(49):15564–15574.
- 514 O’Sullivan, A. E., Lim, C. Y., and Lalor, E. C. (2019a). Look at me when I’m talking to you: Selective attention at a multisensory cocktail party  
515 can be decoded using stimulus reconstruction and alpha power modulations. *European Journal of Neuroscience*, 50(8):3282–3295.
- 516 O’Sullivan, J., Herrero, J., Smith, E., Schevon, C., McKhann, G. M., Sheth, S. A., Mehta, A. D., and Mesgarani, N. (2019b). Hierarchical Encoding  
517 of Attended Auditory Objects in Multi-talker Speech Perception. *Neuron (Cambridge, Mass.)*, 104(6):1195–1209.e3.
- 518 O’Sullivan, J. A., Power, A. J., Mesgarani, N., Rajaram, S., Foxe, J. J., Shinn-Cunningham, B. G., Slaney, M., Shamma, S. A., and Lalor, E. C.  
519 (2015). Attentional Selection in a Cocktail Party Environment Can Be Decoded from Single-Trial EEG. *Cerebral Cortex*, 25(7):1697–1706.
- 520 Parthasarathy, A., Bartlett, E. L., and Kujawa, S. G. (2019). Age-related Changes in Neural Coding of Envelope Cues: Peripheral Declines and  
521 Central Compensation. *Neuroscience*, 407:21–31.

- 522 Peelle, J. E. and Davis, M. H. (2012). Neural Oscillations Carry Speech Rhythm through to Comprehension. *Frontiers in Psychology*,  
523 3(September):1–17.
- 524 Petersen, E. B., Wöstmann, M., Obleser, J., and Lunner, T. (2016). Neural Tracking of Attended versus Ignored Speech Is Differentially Affected  
525 by Hearing Loss. *Journal of Neurophysiology*, 117(1):18–27.
- 526 Pichora-Fuller, M. K., Kramer, S. E., Eckert, M. A., Edwards, B., Hornsby, B. W., Humes, L. E., Lemke, U., Lunner, T., Matthen, M., Mackersie,  
527 C. L., Naylor, G., Phillips, N. A., Richter, M., Rudner, M., Sommers, M. S., Tremblay, K. L., and Wingfield, A. (2016). Hearing Impairment  
528 and Cognitive Energy: The Framework for Understanding Effortful Listening (FUEL). *Ear & Hearing*, 37(1):5S–27S.
- 529 Picton, T. W. (2010). *Human Auditory Evoked Potentials*. Plural Pub.
- 530 Rosen, S. (1992). Temporal Information in Speech: Acoustic, Auditory and Linguistic Aspects. *Phil. Trans. R. Soc. Lond. B*, 336(1278):367–373.
- 531 Saiz-Alia, M., Reichenbach, T., Saiz-Alía, M., and Reichenbach, T. (2020). Computational modeling of the auditory brainstem response to  
532 continuous speech. *Journal of Neural Engineering*, in press(3):0–31.
- 533 Shannon, R. V., Zeng, F.-G., Kamath, V., Wygonski, J., Ekelid, M., Series, N., and Oct, N. (1995). Speech Recognition with Primarily Temporal  
534 Cues. *Source: Science, New Series*, 270(5234):303–304.
- 535 Somers, B., Verschuere, E., and Francart, T. (2019). Neural tracking of the speech envelope in cochlear implant users. *Journal of Neural*  
536 *Engineering*, 16(1).
- 537 Steinschneider, M., Liégeois-Chauvel, C., and Brugge, J. F. (2011). *Auditory Evoked Potentials and Their Utility in the Assessment of Complex*  
538 *Sound Processing*, pages 535–559. Springer US, Boston, MA.
- 539 Theunissen, F. E., Sen, K., and Doupe, A. J. (2000). Spectral-temporal receptive fields of nonlinear auditory neurons obtained using natural sounds.  
540 *Journal of Neuroscience*, 20(6):2315–2331.
- 541 Tichko, P. and Skoe, E. (2017). Frequency-dependent fine structure in the frequency-following response: The byproduct of multiple generators.  
542 *Hearing Research*, 348:1–15.
- 543 Van Canneyt, J., Wouters, J., and Francart, T. (2021a). Cortical compensation for hearing loss, but not age, in neural tracking of the fundamental  
544 frequency of the voice. *Journal of Neurophysiology*, 126(3):791–802.
- 545 Van Canneyt, J., Wouters, J., and Francart, T. (2021b). Enhanced neural tracking of the fundamental frequency of the voice. *IEEE Transactions on*  
546 *Biomedical Engineering (Early Access)*, x:1–1.
- 547 Van Canneyt, J., Wouters, J., and Francart, T. (2021c). Neural tracking of the fundamental frequency of the voice: the effect of voice characteristics.  
548 *European Journal of Neuroscience*, 00(January):1–14.
- 549 Vanthornhout, J., Decruy, L., and Francart, T. (2019). Effect of Task and Attention on Neural Tracking of Speech. *Frontiers in Neuroscience*, 13.
- 550 Vanthornhout, J., Decruy, L., Wouters, J., Simon, J. Z., and Francart, T. (2018). Speech Intelligibility Predicted from Neural Entrainment of the  
551 Speech Envelope. *JARO - Journal of the Association for Research in Otolaryngology*, 19(2):181–191.
- 552 Verschuere, E., Gillis, M., Decruy, L., Vanthornhout, J., and Francart, T. (2022). The effect of speech rate on acoustic and linguistic neural speech  
553 processing.
- 554 Verschuere, E., Somers, B., and Francart, T. (2019). Neural envelope tracking as a measure of speech understanding in cochlear implant users.  
555 *Hearing Research*, 373:23–31.
- 556 Verschuere, E., Vanthornhout, J., and Francart, T. (2021). The effect of stimulus intensity on neural envelope tracking. *Hearing Research*,  
557 403:108175.
- 558 Wang, X., Lu, T., Bendor, D., and Bartlett, E. (2008). Neural coding of temporal information in auditory thalamus and cortex. *Neuroscience*,  
559 154(1):294–303.
- 560 Weissbart, H., Kandylaki, K. D., and Reichenbach, T. (2019). Cortical Tracking of Surprisal during Continuous Speech Comprehension. *Journal*  
561 *of Cognitive Neuroscience*, pages 1–12.
- 562 Yang, M., Sheth, S. A., Schevon, C. A., II, G. M. M., and Mesgarani, N. (2015). Speech Reconstruction from Human Auditory Cortex with Deep  
563 Neural Networks. *Interspeech*, page 5.
- 564 Zan, P., Presacco, A., Anderson, S., and Simon, J. Z. (2020). Exaggerated cortical representation of speech in older listeners: mutual information

565 analysis. *Journal of Neurophysiology*, 124(4):1152–1164.

566 Zion Golumbic, E. M., Ding, N., Bickel, S., Lakatos, P., Schevon, C. A., McKhann, G. M., Goodman, R. R., Emerson, R., Mehta, A. D., Simon,  
567 J. Z., Poeppel, D., and Schroeder, C. E. (2013). Mechanisms Underlying Selective Neuronal Tracking of Attended Speech at a “Cocktail Party”.

568 *Neuron*, 77(5):980–991.

569 Zuk, N. J., Murphy, J. W., Reilly, R. B., and Lalor, E. C. (2021). Envelope reconstruction of speech and music highlights stronger tracking of  
570 speech at low frequencies. *PLOS Computational Biology*, 17(9):e1009358.
